# Supplementary material for: Three-Dimensional Reconstruction of Ocean Circulation fromCoastal Marine Observations: Challenges and Methods
Source: Copernicus journal article supplement (doi:10.5194/os-2019-105), 2019-10-01
Supplement: Supplementary file 1 [file os-2019-105-supplement.pdf]

# Supplementary Material

S1. Real HFR and ADCP observations data. Temporal cross-correlations with a confidence level of 99%. All the available data series of each dataset used. The results presented here complement the results shown in Rubio et al. (2019).

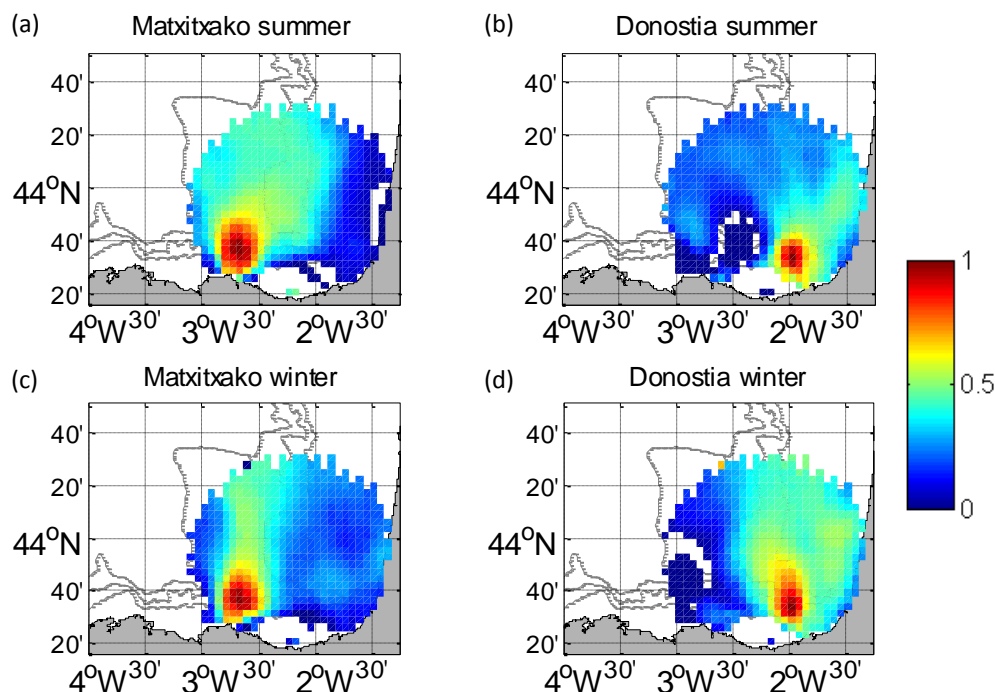

**Figure S1.** Temporal cross-correlation maps between the low-pass filtered time series of the HFR at Matxitxako (a, c) and Donostia (b, d) locations and the rest of the nodes within the HFR footprint area for V and for each season: summer (a, b) and winter (c, d). The results for the U component are shown in Rubio et al., 2019.

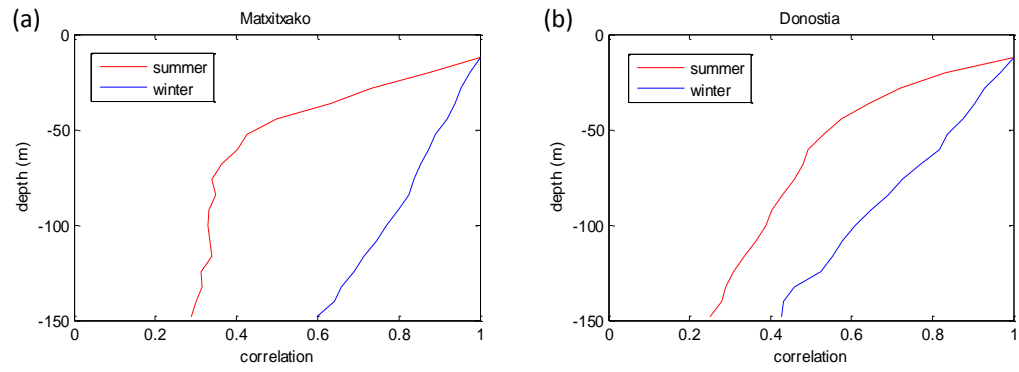

**Figure S2.** Low-pass filtered ADCP temporal V cross-correlations between the first bin (-12.26 m) and the rest of the bins along the water column for Matxitxako (a) and Donostia (b) for the summer (stratified) and winter (well-mixed) periods. The results for U are shown in Rubio et al., 2019.

5

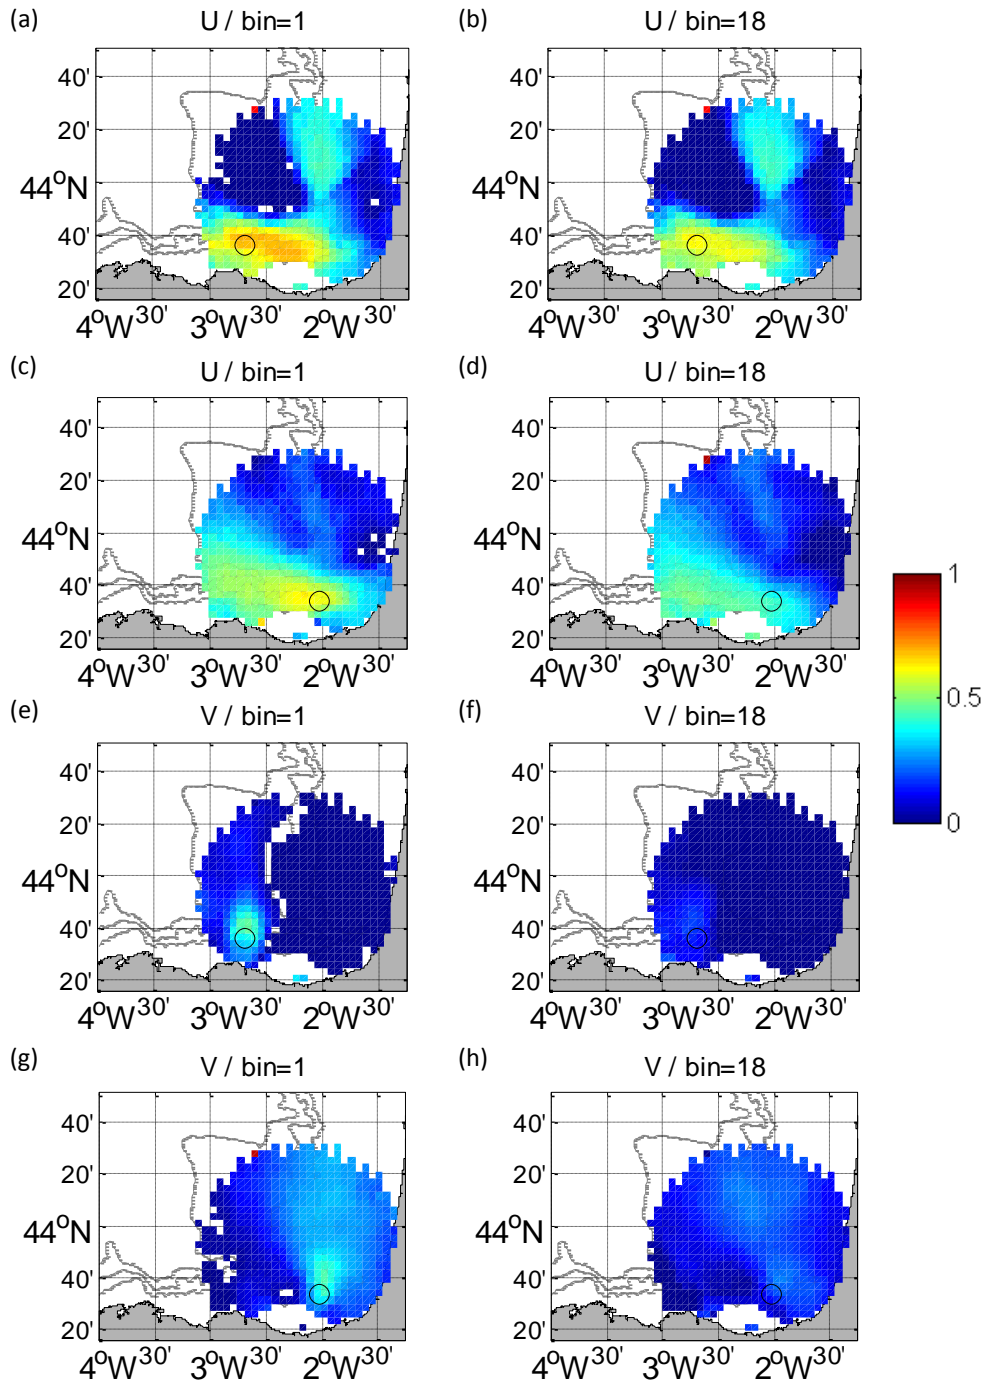

**Figure S3.** Temporal cross-correlation maps between the low-pass filtered time series of the HFR at the surface and the low-pass filtered ADCP time series for the bin 1 (-12.26m) (a, c, e, g) and 18 (-148.26m) (b, d, f, h) at Matxitxako (a, b, e, f) and at Donostia (c, d, g, h) and for U (a, b, c, d) and V (e, f, g, h). The black circles depict the positions of the ADCPs.

## S2. RRMSD maps for ROOI with GLORYS-HR.

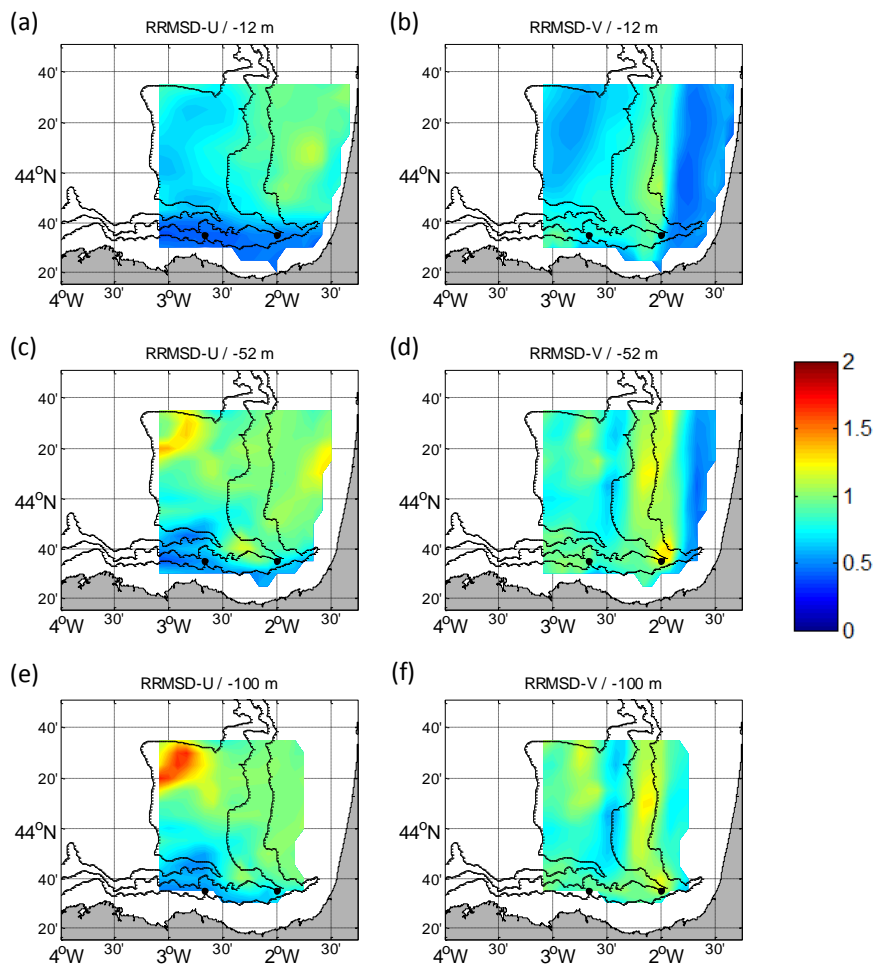

5

**Figure S4.** RRMSD maps for the summer period between the reference fields and the outputs of the ROOI with GLORYS-HR for U (a, c, e) and V (b, d, f). Different depths considered: -12 m (a, b), -52 m (c, d) and -100 m (e, f). The black dots depict the locations of the ADCPs.

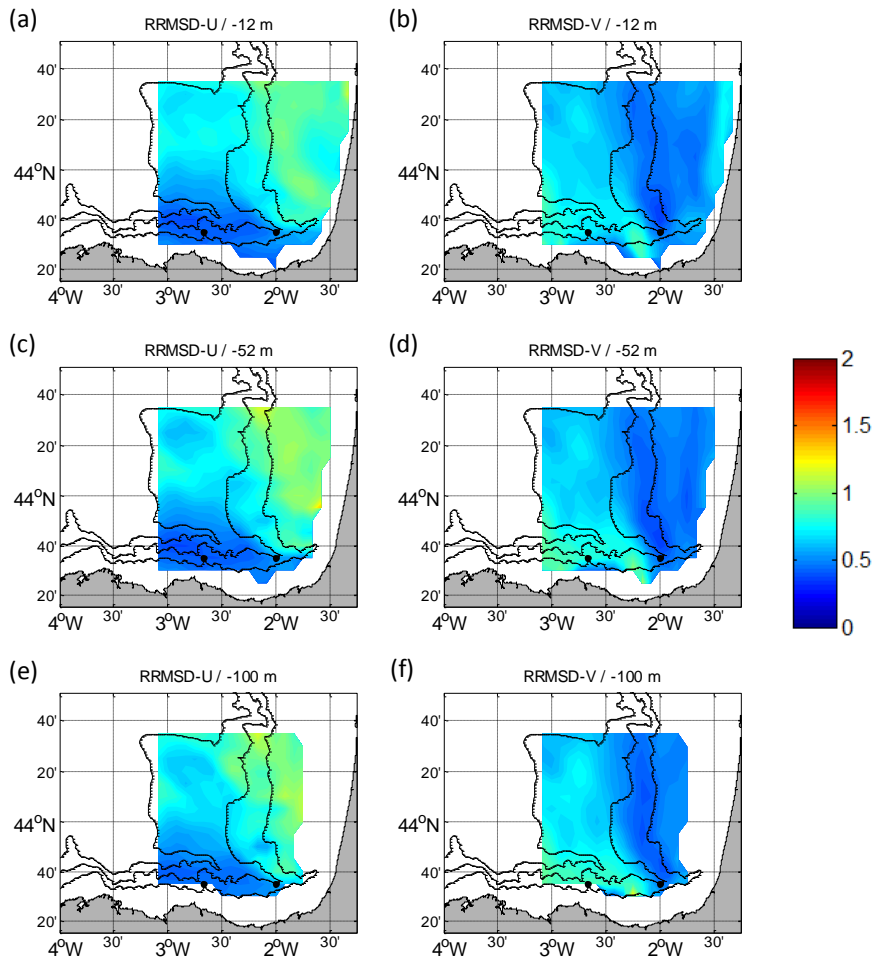

**Figure S5.** RRMSD maps for the winter period between the reference fields and the outputs of the ROOI with GLORYS-HR for U (a, c, e) and V (b, d, f). Different depths considered: -12 m (a, b), -52 m (c, d) and -100 m (e, f). The black dots depict the locations of the ADCPs.

5

**S3. DCT-PLS RRMSD-U maps with higher colorbar values.**

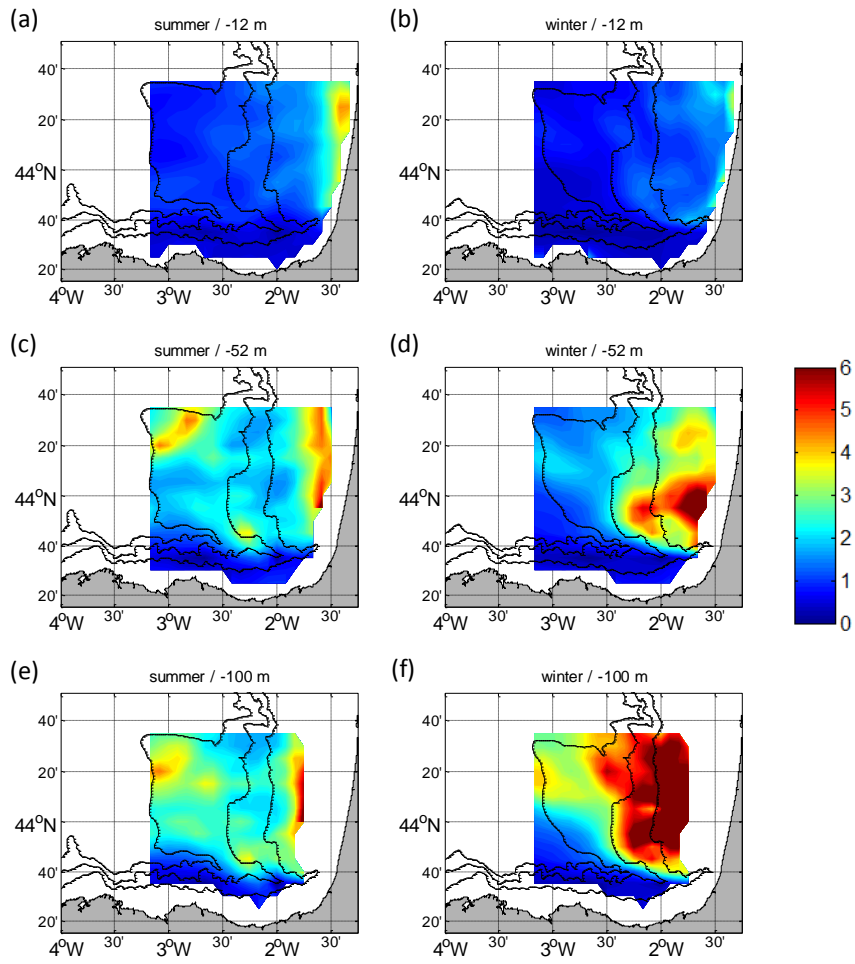

**Figure S6.** RRMSD-U maps for DCT-PLS for the summer period (a, c, e) and for the winter period (b, d, f).

#### **S4. RMSD maps and spatial mean RMSD graphs.**

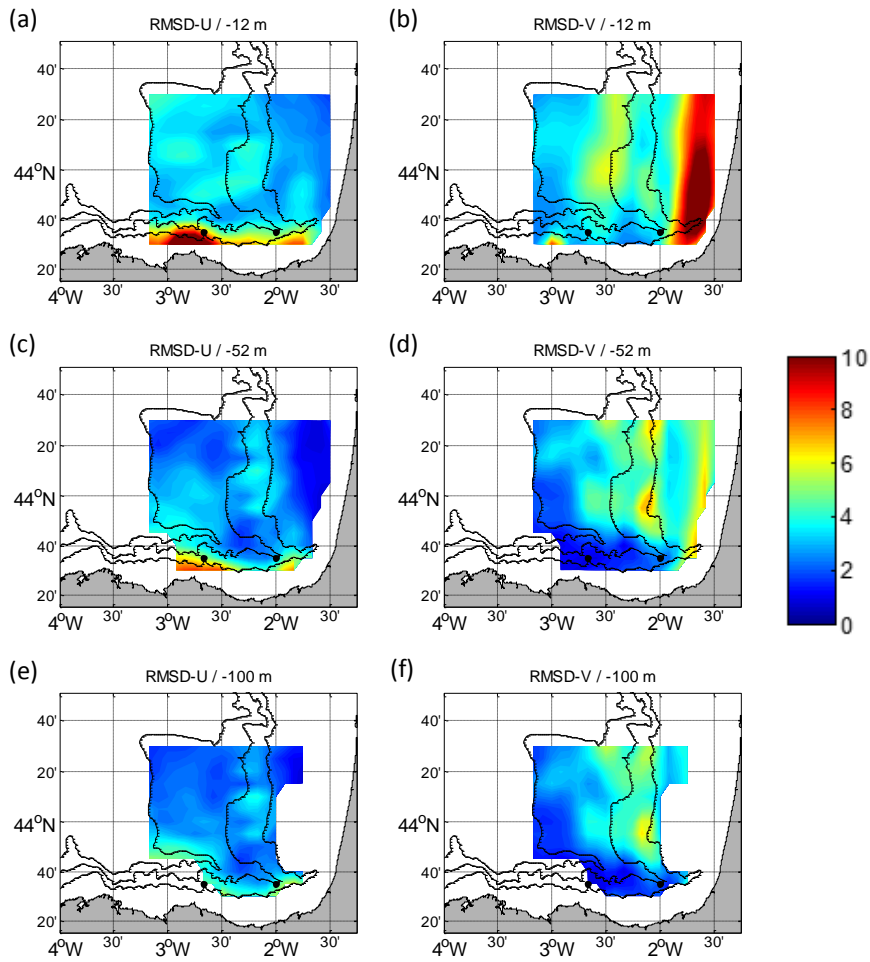

**Figure S7.** RMSD maps for the summer period between the reference fields and the outputs of the ROOI with GLORYS-LR for U (a, c, e) and V (b, d, f). Different depths considered: -12 m (a, b), -52 m (c, d) and -100 m (e, f). The black dots depict the locations of the ADCPs.

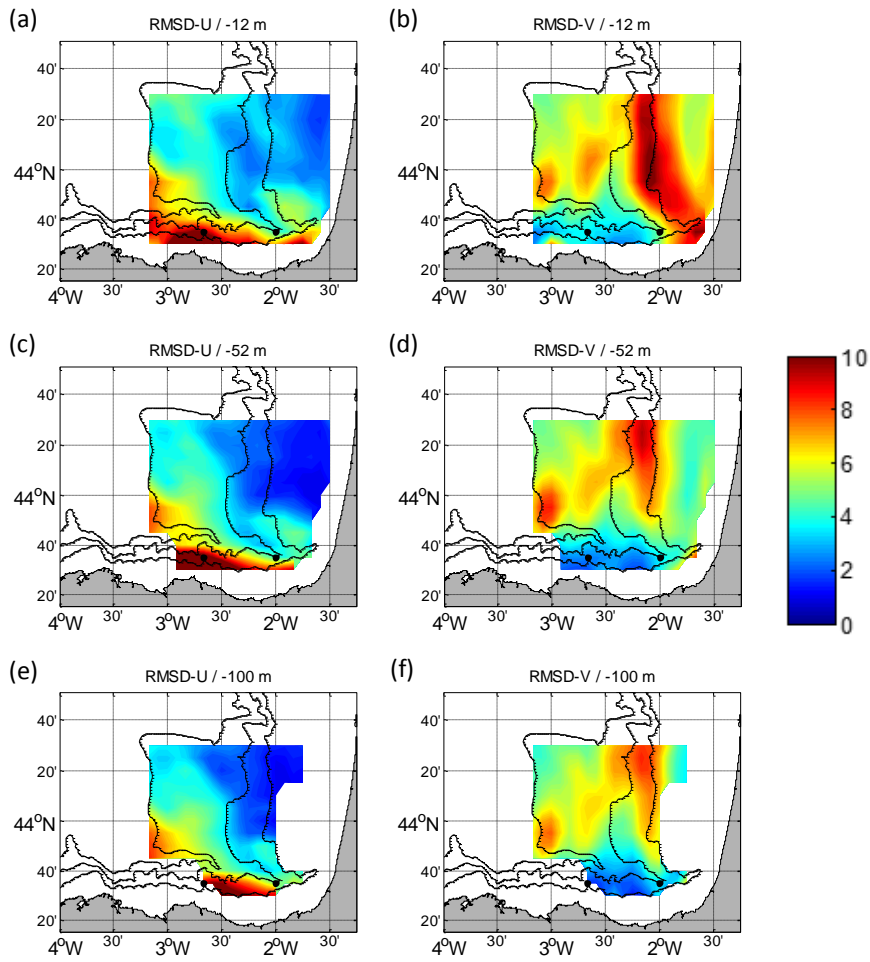

**Figure S8.** RMSD maps for the winter period between the reference fields and the outputs of the ROOI with GLORYS-LR for U (a, c, e) and V (b, d, f). Different depths considered: -12 m (a, b), -52 m (c, d) and -100 m (e, f). The black dots depict the locations of the ADCPs.



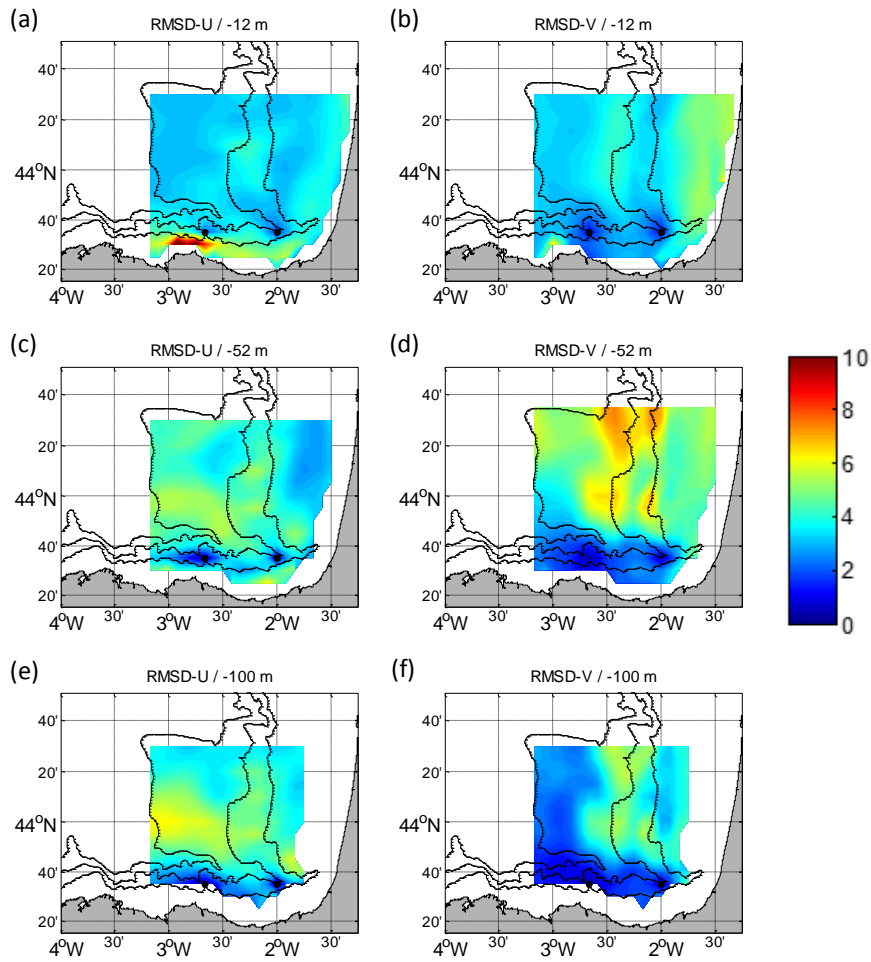

**Figure S9.** RMSD maps for the summer period between the reference fields and the outputs of the DCT-PLS for U (a, c, e) and V (b, d, f). Different depths considered: -12 m (a, b), -52 m (c, d) and -100 m (e, f). The black dots depict the locations of the ADCPs.

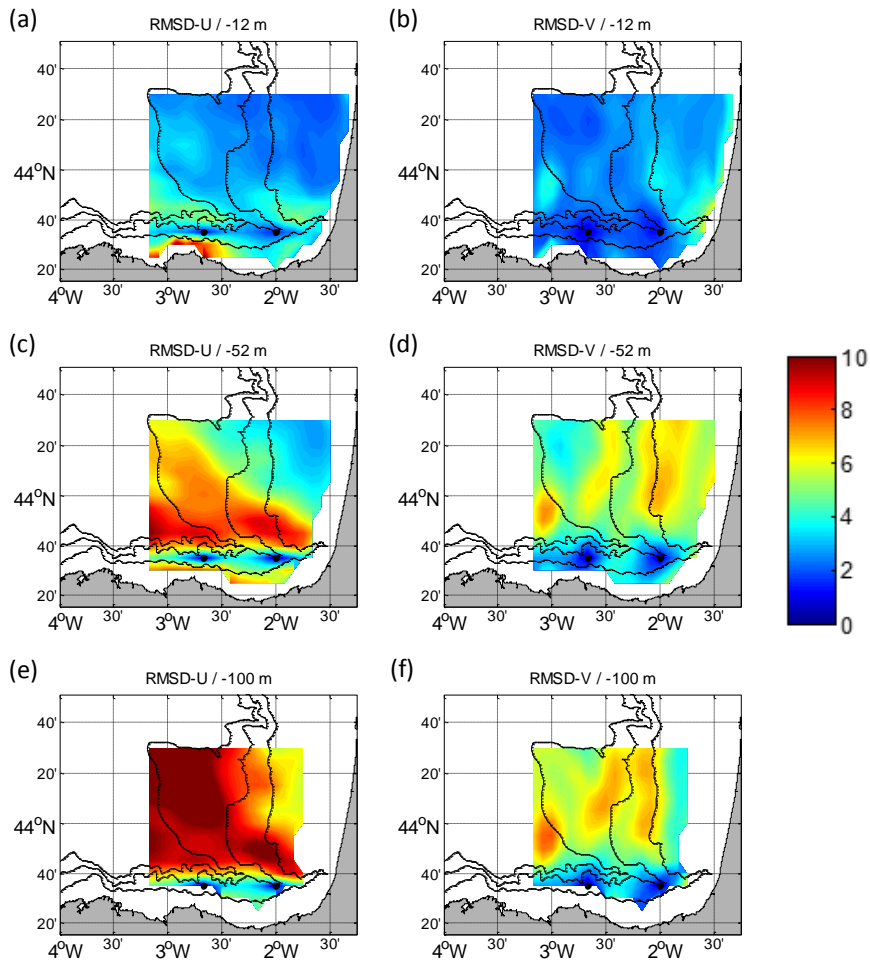

**Figure S10.** RMSD maps for the winter period between the reference fields and the outputs of the DCT-PLS for U (a, c, e) and V (b, d, f). Different depths considered: -12 m (a, b), -52 m (c, d) and -100 m (e, f). The black dots depict the locations of the ADCPs.

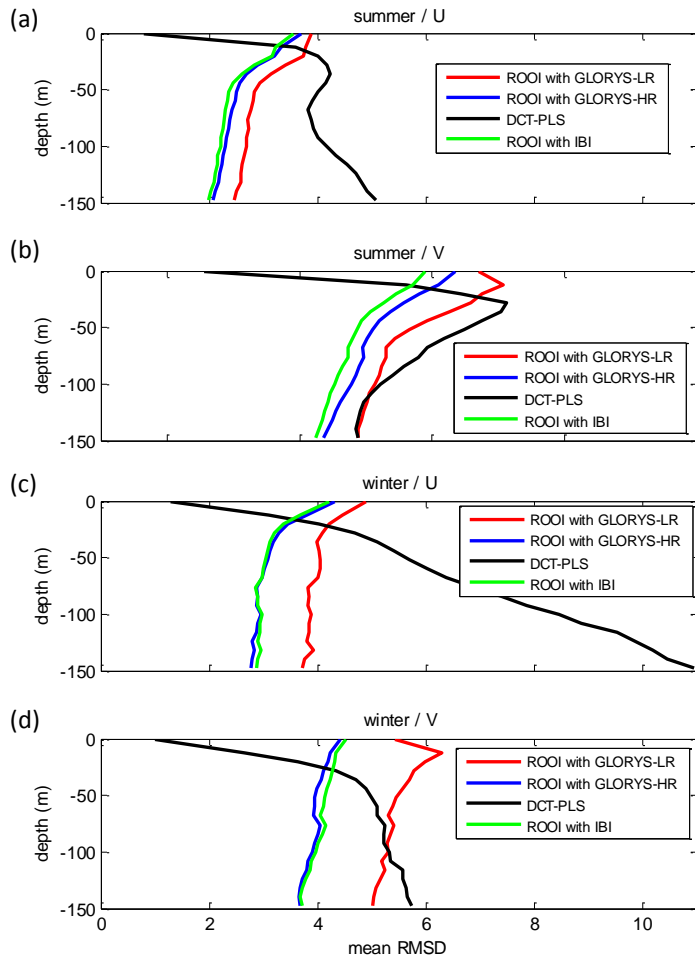

**Figure S11.** Mean RMSDs related to all the data-reconstruction methods for each depth considering the whole grid. For the summer period (a, b) and for the winter period (c, d). U in a, c and V in b, d.

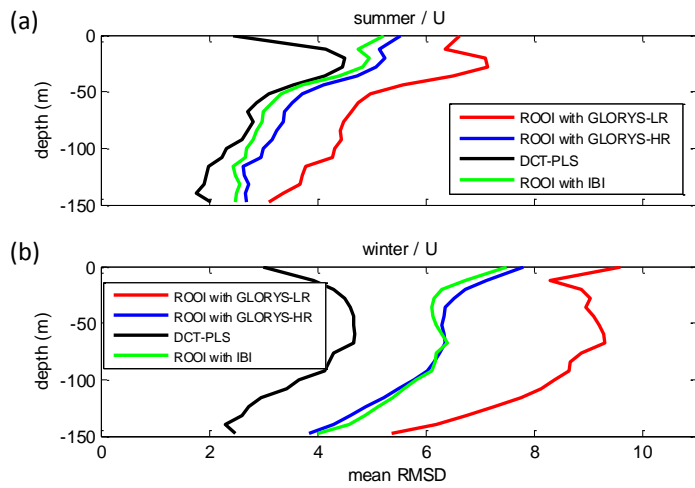

**Figure S12.** Mean RMSD-U related to all the data-reconstruction methods for each depth considering the reduced grid domain. For the summer period (a) and for the winter period (b).
