# Supplementary material for: Three-Dimensional Reconstruction of Ocean Circulation fromCoastal Marine Observations: Challenges and Methods
Source: Copernicus journal article supplement (doi:10.5194/os-2019-105), 2019-10-01
Supplement: Supplementary file [file os-2019-105-RC1-supplement.pdf]

Review of “Three-Dimensional Reconstruction of Ocean Circulation from Coastal Marine Observations: Challenges and Methods”

Page 1

Line 7, should technology be capitalized?

Line 16, should it read multiplatform or multisensory  
Change to “aiming for the continuous”

Line 17, change from “is today” to “are”

Line 18, change to “resolution, but are limited to the”

The authors should make it more clear that the the ADCP and HFR data they are discussing were derived from model output. On the first read of the manuscript, I thought that data was from sensors deployed in the ocean.

Page 2

Line 27, change to “combining simulated information from ”

Line 30, change to “performance”

Page 3

Line 17, change to “with surface temperatures over”

Page 4

Line 1, remove Moreover

Page 5

Line 3, replace Summarizing with In summary,

Line 11, change to “surface current fields along the Mid Atlantic”

Page 6

Line 19, can the authors be more specific on what is meant by the observations and the reference fields

Page 7

What data source was used for the correlation scale tests, IBI, GLORYS-HR or GLORYS-LR?

Page 9

Figs 10-11 are mentioned before Figs 6-9, can this be changed

Page 12

Line 6 change to “the combination of synthetic data that mimics sensors from a multiplatform observing system to reconstruct”
